# Supplementary material
Source: Research Square preprint supplement (doi:10.21203/rs.3.rs-8091344/v1)
Supplement: Supplementary file 1 [file 036386a05540c5d26aa0ff99.docx]

**Participant Information Statement**

**The Australian Undiagnosed Diseases Network (UDN-Aus): An internationally networked national approach for transforming diagnosis for individuals living with rare diseases**

HREC Number: 79712

Principal Investigator: Professor John Christodoulou

Site Principal Investigator: Insert site PI name

Version No: 4.0

Version Date: 20th January 2023

Location: insert recruiting site here

1. **Introduction**

We would like to invite you to participate in a research study that is explained below. You have been invited to take part in this study because you, your child, or someone in your family is suspected to have a rare genetic condition. Knowing what is involved will help you decide if you want to take part. Please read this Information Statement and the attached fact sheet on genomic testing carefully. You will be given a copy of this information and the consent form to keep.

**Important points:**

- Participation in this study is voluntary.
- Take the time you need to decide if you want to participate.
- If you have any questions, please get in contact with the study team.
- You can withdraw at any time without affecting your care.

1. **About this research study**

There are more than 7000 rare diseases that affect around two million Australians. The journey for families seeking a diagnosis can be very long (sometimes 5-10 years). Many rare diseases are genetic conditions; they are caused by changes in the genetic information in the body. Even with advances in technology, some children never receive a diagnosis. This project will look closely at your or your child’s genes and compare them to closely related family members to try to find a diagnosis for the rare condition in your family.

Our bodies are made up of different types of cells. Inside these cells you find genes. Genes are passed down in families from parents to children. You get half your genes from your mother and half from your father. A gene is like a small microchip which contains all the information that makes us what we are, including our eye colour, blood type and whether we are born as a boy or a girl.

There are about 23,000 genes that make up a human being and genes are arranged along a chemical substance called DNA. Sometimes a gene contains a “spelling mistake” that upsets the gene’s coded message. This type of mistake is sometimes called a “variant” or a “mutation”. These types of variants can change the way the gene works and cause different diseases.

Many health or developmental conditions are caused by a variant in one or more genes. These conditions are usually present at birth or may sometimes appear later in life. Rare genetic conditions may occasionally occur in more than one person in a family or can occur for the first time in the person with the condition.

Until recently, doctors and scientists were only able to test one gene at a time. Advances in technology now allow us to test many of our genes at once (genomic testing). For some rare genetic diseases, we already know the gene variant that causes the condition. For others, the exact variant that causes the condition is not known.

Genomic testing has greatly improved our ability to diagnose people with rare genetic disorders, with an answer now being found in up to 50% of individuals. We want to see if new genomic testing technologies can find the gene variant that causes rare disease in your family. A genetic diagnosis can help us to better understand your family’s health condition, and which may provide more certainty about future health implications. It may help doctors find potentially relevant treatments.

1. **Who is running this study?**

This research study is being led by Professor John Christodoulou at the Murdoch Children’s Research Institute (MCRI), Melbourne. It is funded by Genomics Health Futures Mission of the Australian Government’s Medical Research Future Fund. The health professionals and researchers involved in the research study are all employees of medical research institutes, universities, and clinical and diagnostic services.

1. **Are there any costs?**

There will be no out-of-pocket costs for tests or appointments associated with participating in this research study, nor will you be paid. Additional testing which may be suggested by your doctor may not be included as part of this research study. There may be a cost to you for these tests.

1. **What does participation involve?**

**Genomic Test**: If you or your family member had genomic testing that did not find an answer, you will be invited into the study. We will re-analyse the genomic data because scientific knowledge and analysis tools improve quickly. If this does not find a genetic answer, we will then use other genomic tests on genetic information from a saliva or blood sample from you and/or your close family members. The genetic information could be DNA, that makes up your genes, or RNA which is the message the gene codes for. If a gene change is identified that might be medically important, we will do protein studies and other tests to determine if the gene change affects its function. For these functional studies we may need a fresh blood sample or, other types of samples. **It is your choice which of those samples we take**. Collecting and testing different tissue samples increases the chance that we will be able to find a genetic variant that causes the rare disease in your family. **You do not have to agree to all samples being collected in order to participate in the study**. The types of samples we **may** collect include:

- **skin, and/or**
- **muscle, and/or**
- **urine**.

| **Required Samples** | **Optional Samples** |
| --- | --- |
| DNA from saliva or blood (either can be used to participate) | Skin biopsy |
| Tissue biopsies |
| Urine |

Sometimes we find gene variants, but we do not know if they can cause a health or developmental condition. To make a diagnosis in your family, we may ask to take a skin biopsy from you or your child. Studying how the gene variant works in your or your child’s skin cells can help us to understand if the variant can cause the rare condition in your family. Wherever possible, we will collect these samples at the same time as any clinical procedures that are part of your or your child’s usual care.

**Establishment of a permanent cell line (optional):** In this project, we may establish a permanent cell line from your or your child’s tissue sample. A cell line is formed when we take cells from the blood, skin or other tissues and grow them in the laboratory. We can keep the cells alive indefinitely. Creating a cell line allows us to produce a never-ending supply of cells to look at the specific effect of different genetic variants in the laboratory, to try to work out if the variant is the cause of the condition.

**Health Information:** We will also collect health information about you, your child and other relevant family members, including names and dates of birth, family history, medical and developmental history.

**Clinical Photographs (optional):** We may ask to take clinical photographs of you or your child for inclusion in this research and in scientific journal articles written about the results of this study. Images may be used in medical journal and electronic publications and will be seen by health professionals, scientists and researchers. Identifying information will not be published.

**Result Return:** The results of the genomic test will be given to you during a scheduled appointment with your or your child’s treating specialist doctor, a clinical geneticist or a genetic counsellor. It may take a year or more for your test results to be available. The genomic test may or may not provide a diagnosis (see section 6). Your clinical genetics team may arrange for clinical testing to confirm the research result. This would be done in an accredited laboratory, which will issue a separate diagnostic test report.

**Surveys:** You will also be asked to complete a survey prior to the test commencing and up to 12 months after the return of the results. The surveys will ask you about your experience of the study and those of your doctor at having been involved in this project, and costs and benefits to you because of being involved in this project. The surveys will be paper-based or online, and we anticipate will take no longer than one hour of your time for each survey.

1. **What are the possible results of the genomic test?**

- A genetic cause for your/your child’s condition(s) may be found.
- A genetic cause for your/your child’s condition(s) may not be found.
- The results may be of ‘uncertain significance’, which means they cannot be understood using current available information.

Genomic test results are based on current knowledge, which may change in the future. This test will not predict all future health problems.

1. **What are the possible benefits of taking part?**

The results of genomic testing may help health professionals involved in your/your child’s care to better understand and manage your condition.

Your family may benefit from this information as it might be possible for your doctor to give you more accurate information about the chance of having further children with the gene variant, or if other members of your family might develop the condition.

Sometimes, genomic test results may also provide information about the genetic risks of family members. Where appropriate, this may be used to help inform genetic counselling and testing of family members. This information will be communicated to your family members by your local clinical genetics team.

﻿If you decide to find out the results of your child’s genomic tests, this may have implications for them in the future. For example, they may need to tell third parties about these test results. These third parties could include insurance companies, employers, and financial or educational institutions

This research may benefit others in the future, as the aim of this study is to improve the welfare of patients and families affected by rare genetic conditions.

1. **What are the possible risks, side-effects, discomforts and/or inconveniences?**

**Blood tests:** There are no major risks associated with a blood test. However, you or your child may feel some discomfort during the test. You/your child may feel a sting when the needle is put in the arm. We can use a cream to numb the skin before we take blood.

You/your child may get some bruising, swelling or bleeding where the needle enters the skin. Some people can feel a little light-headed when blood is taken.

**Skin Biopsy:** A skin biopsy is generally a simple and safe procedure using a local anaesthetic but there may be some bleeding and/or bruising where the skin is taken, and some may experience minor discomfort. The procedure will leave a small scar (5mm). In some cases, infection may occur. If you or your child is having another procedure under anaesthetic, we may ask if we can collect a skin biopsy at the same time to minimise the discomfort for you or your child.

**Tissue Biopsy:** If an extra procedure is needed to get a tissue sample for genetic analysis, this will be performed by an appropriately qualified doctor. The approach used to obtain tissue samples may vary. There may be some bleeding, discomfort, or pain from the tissue biopsy. In some cases, infection may occur, and some people experience fainting or distress. To minimise risks and discomforts, you or your child may receive local anaesthetics to numb the area of the biopsy. Some surgical procedures require a general anaesthetic to make you or your child unconscious during the procedure. We will only collect samples for this research under general anaesthesia if you or your child already has the general anaesthesia planned as part of their medical care. Where possible, we will use stored tissue samples from previous surgical procedures, or we may ask if we can collect a tissue sample during a future planned procedure.

**Genetic testing – issues for you/your child:** A genetic test has a number of potential results. These include an informative result that explains you or your child’s rare genetic condition, a negative or uninformative result where no genetic explanation is found, or an uncertain result that we do not understand at this point in time. Sometimes, samples from parents or other close relatives (usually siblings), may help us to understand uncertain results. We may ask for a blood and/or saliva sample from close relatives to help understand your/your child’s genetic test result.

Genetic testing can raise important issues. If an important genetic variant is found, you may need to tell your child about this in the future, when they are old enough to understand. For example, the test results may show that your child has an increased chance of developing a particular condition or medical problem. This increased chance does not mean that they will actually develop the condition.

We are only searching for genetic changes that are related to your family’s rare genetic condition. However, it is possible that we may find genetic changes responsible for other, medically important genetic conditions that are unrelated to that condition. Overall, the chance of this is low. However, if we discover that you or your child has a genetic condition for which we have specific treatment recommendations, we will discuss the findings with you. These results might also be important for the medical care of others in the family, such as siblings or parents. We will also refer you, and your family if appropriate, to a genetic counsellor. With your permission, we will share these results with your/your child’s doctors.

**Genetic testing – issues for your family:** The genetic tests may tell us something about you or your wider family. This could affect you and your family emotionally and interfere with your relationships. For example, by chance, we may discover that parents and children or siblings may not be biologically related. While the identification of non-paternity is extremely unlikely, if this is identified, we will not disclose this to you, unless there are clinical implications from this. An example is where it could impact the need for future reproductive interventions such as prenatal diagnosis or preimplantation genetic testing. In these cases, the clinical team will determine the most appropriate pathway of disclosure to you and genetic counselling support will be provided. This is in keeping with standard clinical genetics practice.

Some people in your family might want to know about your or your child’s results. They may want to know whether the results have implications for them. You can decide whether or not you want to tell them about the test results.

**Genetic testing – issues to think about:** If you decide to go ahead with your/your child’s genetic test, this may have implications for you or them in the future. For example, you may need to reveal these test results to third parties such as insurance companies, employers, and financial or educational institutions.

Some people find it stressful to get information about their genetic make-up and possible future health issues.

Your/your child’s participation in this project could raise personal issues for you. If this happens, we can refer you to an independent genetic counsellor. This will be free of charge. We are also available to discuss any concerns you may have.

We will keep your/your child’s test results private, but we cannot guarantee complete confidentiality. Some genetic variants are very rare, and we aim to publish results from this study in scientific journal articles. Therefore, it may be possible to identify you or your child from the test results or the name of the gene.

If the testing shows important information about your relatives,contact with your relatives about the testing is encouraged. You may wish to do this yourself or you may ask your doctor to assist you in this if you choose.

1. **What happens to my sample(s) and data?**

**Your Sample(s)**

Your genomic sequencing data will be transferred to our analysis tool called *seqr* for reanalysis. If no answer is found following reanalysis, blood will be sent to the Victorian Clinical Genetics Services (Melbourne) or Garvan Institute of Medical Research (Sydney) for further genomic sequencing and/or RNA sequencing. Tissue samples or skin cells will be used for functional studies and depending on what functional studies need to be performed, we may send this material to expert research collaborators. If we do this, your/your child’s samples will be labelled with their code number only. It will not be possible for the testing laboratory to identify your child. **It is important to note that any samples sent overseas are not protected by Australian laws and regulations.**

As part of this research study, your sample(s) will be stored indefinitely in case further research may be needed to help find a diagnosis and/or to better understand your health condition. Some samples may be used by the laboratory or research study as a control sample. You can choose to have your samples removed from storage at any time (see Section 15).

If you are signing this consent on behalf of a child who is less than 18 years of age, when your child turns 18 years of age we will **not** contact them to ask them to re-consent to this research. We ask that you tell them about their samples stored for this study when they are an appropriate age.

**Your data**

All data collected as part of this research study will be stored in secure, controlled-access databases that meet national and international data standards. Stringent security measures will help prevent unauthorised access to or misuse of the data.

If you pass away and we are informed of this, we will seek advice from your next of kin about their wishes to store your data or samples. If the data is in a repository from which it can’t be extracted, we won’t be able to destroy that data.  If your next of kin indicates they are happy for the study to continue to store your samples, and an opportunity for future research arises, if you have consented to this, we will contact them to discuss reconsenting for this new research.  If your child passes away and you inform us, we will discuss with you your preferences for data and sample storage. Again, if this data is in a repository from which it can’t be extracted, we won’t be able to destroy that data.

Your/your child’s data obtained through this research study:

- will be accessed by those involved in your/your child’s care and personnel working on this study
- may be released to genetic services to help with the care of other family members, without your identity being revealed to family members
- will be stored and available for other research studies if you consent to donate your data for this purpose (optional – see section 13)
- will otherwise remain confidential, except as required or allowed by law.

Personal information (including your/your child’s name, date of birth and address) will be removed and replaced with a unique study code. Whenever possible, only the minimum, necessary data will be shared with other researchers. This maintains your privacy and allows our research team to link any research findings back to you/your child. This will be important if there are findings that have implications for your or your child’s future health care, so that it may be possible to contact you to return these results.

1. **Using your data to advance knowledge**

Your/your child’s genomic test results and health data obtained through the research study may also be shared with national or international databases. This improves understanding of human genetics by comparing your results to those from other people.

In such cases, your data will be ‘anonymised’. This means that there will be no personal information or study code attached to the data and it cannot be linked back to you. Therefore, there is no direct benefit to you/your child, but your data can support health advances that benefit others.

1. **Publication of results**

The results of this research study will be published and/or presented at scientific and medical meetings. Your information will be provided in a way that means you cannot be identified. Images from scientific investigations that do not identify you will be published without requesting additional consent. However, we will contact you if we wish to include any clinical photos or images. We will only publish these images with the formal written consent of the participant or parent, who can decide which images (if any) may be used in a research publication.

1. **Additional details**

Your/your child’s health records and any data collected and stored for the research study may be reviewed at any time to make sure we are following correct study procedures. This review may be done by the Human Research Ethics Committee that approved this research project, regulatory authorities, or as required by law. Your participation in this research study may also be recorded in your health records.

Your/your child’s participation and the way this study is conducted abides by relevant Australian and State/Territory privacy laws. Under those and other relevant laws, you have the right to request access to your information collected and stored by the study team. You also have the right to request the correction of any information you disagree with. Please contact the study team member named at the end of this document if you would like to request access to your information.

1. **Donating your data and sample(s) for other research studies (optional)**

You will also be asked whether you consent to donating your/your child’s data (health-related, genomic and self-reported information) and sample(s) collected in this research study, for use in other research approved by a registered Human Research Ethics Committee. This committee checks that studies are scientifically and ethically acceptable. This means that the research respects and protects you and the other people who have donated data and/or sample(s).

Key information about donating your/your child’s sample(s) and data:

- In most cases, you will not be recontacted for further consent.
- Access to your data and/or sample(s) will only be granted if approved by the study Data Access Committee.
- The research may or may not be related to this study.
- If you consent, personal information will be removed from your data and sample(s).
- Research findings from these studies will not be returned to you.
- Your/your child’s data may be stored on controlled-access national or international data repositories.
- Your/you child’s data and/or sample(s) may be shared with researchers in Australia or overseas, including at universities, hospitals, medical research institutes, not-for-profits, or for-profit biomedical, pharmaceutical or diagnostic testing companies.
- The results of the studies are unlikely to be of direct benefit to you.
- Data will not be shared for marketing or insurance purposes.

1. **Future research (optional)**

We would like you to consider letting us contact you with information about new research projects that may be suitable for you or your child in the future. The information we provide will give you the full details about the project. It is your choice whether you agree to take part in these future projects. You do not have to take part in any future research you are given information about.

1. **Withdrawal from the study**

If you decide to withdraw from the study before genomic testing is performed and data is collected, we will not continue. Any specimens will be disposed of or can be returned to the family upon request.

If you withdraw after genomic testing is performed and data is collected, you can choose not to be told about the result. However, we will use any data already collected for research purposes unless you tell us not to. If your data has already been shared, it may not be possible to retrieve or remove all your data that has been collected as part of this study.

1. **Further information and who to contact**

If you would like any further information concerning this study, or to withdraw, you can contact:

Site Principal Investigator

*[Name]*

*[Position]*

*[Phone Number]*

*[Email Address]*

Clinical contact person

*[Name]*

*[Position]*

*[Phone Number]*

*[Email Address]*

This research study has been reviewed by the Human Research Ethics Committee (HREC) of the Royal Children’s Hospital. This study will be carried out according to the National Statement on Ethical Conduct in Human Research (2007).

If you have any complaints about any aspect of the study, the way it is being conducted, or any questions about being a research participant in general, then you may contact:

**Reviewing HREC approving this research and HREC Executive Officer details:**

Ms Sophie Gatenby, HREC Manager

Telephone: 03 9345 5044

Email: rch.ethics@rch.org.au

**Local HREC Office contact (Single Site – Research Governance Officer)**

*[Name]*

*[Position]*

*[Phone Number]*

*[Email Address]*

**Consent Form for Genomic Testing and Participation in Research**

It is my choice to have genomic testing and participate in the **The Australian Undiagnosed Diseases Network (UDN-Aus): An internationally networked national approach for transforming diagnosis for individuals living with rare diseases** research study. I can say yes or no to the options on this form.

I, _________________________________________________________________________(patient, parent/guardian), understand that my/my child’s DNA and other samples will be tested by genomic and other testing to look for changes in genes that may be associated with ________________________________________(condition).

- I have read this information statement and I understand its contents.
- I understand what my child and I have to do to be involved in this project.
- I understand the risks I or my child could face because of their involvement in this project.
- I voluntarily consent for me or my child to take part in this research project.
- I have had an opportunity to ask questions about the project and I am satisfied with the answers I have received.
- I understand that this project has been approved by The Royal Children’s Hospital Melbourne Human Research Ethics Committee. I understand that the project is required to be carried out in line with the National Statement on Ethical Conduct in Human Research (2007).
- I understand I will receive a copy of this Information Statement and Consent Form.

**By signing this form, I consent to:**

- My or my child’s DNA samples (blood, skin, saliva, other tissue) being analysed for this research.
- Sharing my or my child’s genetic data, medical information relevant to the rare disease in our family, DNA, tissue or cellular material, with relevant research collaborators working on ethically approved research in this field.
- Sharing my or my child’s de-identified genomic data with approved national and international databases.

The following person can be given my results if I am unable to be contacted:

**Name:**  **Contact:**

**Data and Sample Sharing**

- Results will be available to health professionals involved in my or my child’s care.
- Results may also be used to inform genetic counselling and testing of family members, though my or my child’s identity will not be revealed to them.
- My or my child’s personal information will be kept confidential and will only be accessed by those involved in my or my child’s care and study members, unless required or allowed by law.
- If my or my child’s sample and other data are shared, personal information will be removed. My or my child’s sample or data may be shared, in Australia or internationally, to find a diagnosis and/or further the understanding of my or my child’s condition. Results of such activities may be returned to me if relevant to my care.
- My or my child’s genomic data and other data may be combined with other people's data internationally to increase understanding about human genetics. Use of this data cannot be traced back to me or my child and any findings cannot be returned.

**In agreeing to participate in this research study, I understand that:**

- I or my child are free to withdraw at any time during the study without any impact on my usual care.
- I or my child may be asked to complete survey(s) about our understanding and experience of genomic testing and the costs associated with living with my or my child’s condition.
- The health professionals and organisations involved in my or my child’s care may release my or my child’s information for the purposes of this study.
- The laboratory undertaking the testing will release my or my child’s test report and genomic data associated with this study to the research team. The UDN-Aus projectwill then have responsibility for the data.
- Further research may be initiated to understand my or my child’s genomic results and/or condition. Additional samples may be requested to undertake this research.
- I or my child may be invited to participate in other research projects not necessarily related to this project.

**Optional consent**

| I do | I do not | Wish to receive a summary of research findings from this research study. |
| --- | --- | --- |
| I do | I do not | Consent to the establishment of a permanent cell line from my or my child’s blood cells, tissue or skin biopsy to allow future genetic and functional testing. |
| I do | I do not | Consent to me or my child to have clinical photographs taken for the purposes of this research, and for inclusion of these photographs in scientific/medical journal articles. |
| I do | I do not | Consent for my or my child’s tissue sample to be stored for use in future ethically approved research related to rare diseases. |
| I do | I do not | Consent to the storage and use of my or my child’s coded, re-identifiable information in future ethically-approved research projects related to rare diseases. |
| I do | I do not | Consent to be contacted about future research projects related to rare diseases. |

I provide consent to have genomic testing and participate in research as summarised in this form.

**Participant – child**

| Full Name |  | Date of Birth |  |
| --- | --- | --- | --- |
| Signature |  | Date of Signature |  |
| Address |  | | |
|  | | | |
| Email |  | | |

**Participant – parent/guardian**

| Full Name |  | Date of Birth |  |
| --- | --- | --- | --- |
| Signature |  | Date of Signature |  |
| Address |  | | |
|  | | | |
| Email |  | | |

**Study Team Member/Health Professional**

I have explained the study to the participant who has signed above, and believe that they understand the purpose, extent and possible risks of their involvement in this study.

| Full Name |  | | |
| --- | --- | --- | --- |
| Signature |  | Date of Signature |  |

Note: All parties signing the Consent Form must date their own signature.

NOTE: Copy of this consent is to be sent to testing laboratory with sample.

**Additional Family Member Consent**

I consent to:

- Genetic testing on my sample for the purposes of clarifying results of the genomic testing that is being performed on my child’s/relative’s DNA sample
- The sharing requirements of my data and samples as part of this research project (stated above)

A separate report may not be issued for family members who have given a sample for the purpose of understanding the result of the person recruited to this study.

**Relative 1**

| Relationship to the participant: |  |
| --- | --- |

| Name |  | Date of Birth |
| --- | --- | --- |

| Signature |  | Date of Signature |
| --- | --- | --- |

**Relative 2**

| Relationship to the participant: |  |
| --- | --- |

| Name |  | Date of Birth |
| --- | --- | --- |

| Signature |  | Date of Signature |
| --- | --- | --- |

**Relative 3**

| Relationship to the participant: |  |
| --- | --- |

| Name |  | Date of Birth |
| --- | --- | --- |

| Signature |  | Date of Signature |
| --- | --- | --- |

Note: All parties signing the consent form must date their own signature.

**Record of Verbal Consent**

| **HREC Project Number:** | **79712** |
| --- | --- |

| **Research Project Title:** | **The Australian Undiagnosed Diseases Network (UDN-Aus): An internationally networked national approach for transforming diagnosis for individuals living with rare diseases** |
| --- | --- |

| Participant Name: |
| --- |
| Date of Birth: |
| UR Number: |
| GF Number: |
| Parent Name (if applicable): |
| Mailing Address: |
| Phone Number: |
| Email Address: |
| Date Information Statement/Brochure sent: |

| Date of follow-up phone contact: |
| --- |
| Spoke to (name or parent/participant): |

| Yes | No | Do you give your consent for you/your child to participate in this project? |
| --- | --- | --- |

Optional Consent

| I do | I do not | Wish to receive a summary of research findings from this research study. |
| --- | --- | --- |
| I do | I do not | Consent to the establishment of a permanent cell line from my or my child’s blood cells, tissue or skin biopsy to allow future genetic and functional testing. |
| I do | I do not | Consent to me or my child to have clinical photographs taken for the purposes of this research, and for inclusion of these photographs in scientific/medical journal articles. |
| I do | I do not | Consent for my or my child’s tissue sample to be stored for use in future ethically approved research related to rare diseases. |
| I do | I do not | Consent to the storage and use of my or my child’s coded, re-identifiable information in future ethically-approved research projects related to rare diseases. |
| I do | I do not | Consent to be contacted about future research projects related to rare diseases. |

| Name of person obtaining consent: |
| --- |

| Signature of Person Obtaining Consent: |
| --- |

| Date: | Time: |
| --- | --- |

**Additional Family Member Consent**

| Yes | No | Do you give your consent to participate in this project to help understand the result of your relative? |
| --- | --- | --- |

| Name: |
| --- |
| Date of Birth: |
| Relationship to the participant: |

| Yes | No | Do you give your consent to participate in this project to help understand the result of your relative? |
| --- | --- | --- |

| Name: |
| --- |
| Date of Birth: |
| Relationship to the participant: |

| Yes | No | Do you give your consent to participate in this project to help understand the result of your relative? |
| --- | --- | --- |

| Name: |
| --- |
| Date of Birth: |
| Relationship to the participant: |

**Form for Withdrawal of Participation**

**The Australian Undiagnosed Diseases Network (UDN-Aus): An internationally networked national approach for transforming diagnosis for individuals living with rare diseases**

HREC Number: 79712

Principal Investigator: Professor John Christodoulou

Site Principal Investigator: Insert site PI name

Location: insert recruiting site here

**Declaration by Participant**

I wish to withdraw from participation in **Australian Undiagnosed Diseases Network (UDN-Aus)** research study. I understand that such withdrawal will not affect my routine treatment, my relationship with those treating me or my relationship with *[Institution name]*.

If genomic testing has already been performed, I request that the result be disclosed to me:

**□ Yes        □ No**

Any data already collected can continue to be used for research purposes:

**□ Yes        □ No**

I understand that if my data that has been collected as part of this study has already been shared, it may not be possible to retrieve or remove all my data.

| Full Name |  | | |
| --- | --- | --- | --- |
| Signature |  | Date of Signature |  |

*In the event that the participant’s decision to withdraw is communicated verbally, the study team member/health professional will need to provide a description of the circumstances below.*

|  |
| --- |

**Study Team Member/Health Professional**

I have explained the implications of study withdrawal to the participant who has signed above, and believe that they understood that explanation.

| Full Name |  | | |
| --- | --- | --- | --- |
| Signature |  | Date of Signature |  |

Note: All parties signing the withdrawal section must date their own signature.
