# Supplementary material
Source: Research Square preprint supplement (doi:10.21203/rs.3.rs-8091344/v1)
Supplement: Supplementary file 2 [file 064befb94a6d5f76b6ec75d2.docx]

**Supplementary files**

Supplementary File S1: Multi-Institute and Research Collaboration Agreement Timeframes

Supplementary File S2: Human Research Ethics Committee and Site-Specific Governance Approvals

Supplementary File S3: Participant Information and Consent Form (PICF)

Supplementary File S4: Template Research Report

- A) Positive Report
- B) Negative Report

Supplementary File S5: Data Transfer Agreement Timelines

Supplementary File S6: Sample Handling Standard Operating Procedure

Supplementary File S7: Pathology Research Agreement Timelines

Supplementary File S8: Template Study Request Form
