# Supplementary material
Source: Research Square preprint supplement (doi:10.21203/rs.3.rs-8091344/v1)
Supplement: Supplementary file 3 [file 1719d9a4504f1d623c4677fa.docx]

| Referring Physician: | x Dr xx  xxx Hospital  xxx Street  Suburb  STATE POSTCODE | Patient: | Surname: xxx  First name: xxx  Address: xxx  DOB: xxx  Sex: Male/Female  Sample ID: UDN00XX  Date data received:  Date reported: |
| --- | --- | --- | --- |

cc xxxxxxxxx

The Australian Undiagnosed Disease Network (UDN-Aus)

Research Report

| Investigation: | Research reanalysis of the trio/singleton whole genome sequencing/whole exome sequencing data |
| --- | --- |
| Clinical Details: | Patient phenotype |
|  |  |
| Context: | The previous clinical genetic report (dd/mm/yyyy) was non-diagnostic/reported one variant of uncertain significance. Reanalysis of the previously generated data was performed in a research setting.  Results cannot be used in clinical management unless clinically validated by an accredited laboratory. |
|  |  |
| Prioritised gene lists: | List gene panels |
|  |  |
| Research Results: | Heterozygous variants associated with this patient’s condition have been detected.  / Two likely pathogenic variants of clinical relevance have been identified. |
|  |  |
| Interpretation: | This patient is heterozygous/homozygous/compound heterozygous for one/two variants in *GENE*, classification (e.g. likely pathogenic, pathogenicor variant of uncertain significance (VUS)). This gene has not been previously associated with human disease /// Heterozygous/biallelic pathogenic variants in *GENE* are associated with condition, inheritance (AR/AD/XD/XR) (MIM ######).  OPTIONAL – VUS ONLY  In future stages of the UDN-Aus project, this patient’s data will undergo automated genomic reanalysis, structural variant analysis and mitochondrial analysis. These analyses, other targeted investigations, reanalysis of the genomic data, or additional clinical information might aid in the diagnosis of this individual in the future. The UDN-Aus team will be in contact with you in the future to discuss these and any relevant results. |

Findings related to phenotype:

| Gene | Phenotype (Inheritance) | Genomic location (hg38) | Variant | **Zygosity** | Classification |
| --- | --- | --- | --- | --- | --- |
| *GENE* | condition (MIM######, inheritance) | chr#:###### | c.  p. | Het/Hom | Classification |

Legend: AR= Autosomal recessive, AD= Autosomal dominant, Het= Heterozygous, Hom= Homozygous.

Variants with a frequency of >1% that have unknown clinical significance were identified in a number of phenotype-specific genes but were not reported.

| Variant description: |  |
| --- | --- |
| *GENE* | **NM_:c.**  **NP_:p.** |
|  | **EVIDENCE FOR PATHOGENICITY. EDIT, ADD OR DELETE SENTENCES AS REQUIRED**  A de novo/inherited homozygous/heterozygous variant was identified in the *GENE* gene. The NM_:c. variant is a variant type, which is predicted to/results in consequence. Mechanism of disease (if known). *In silico* tools predict this variant to be disease-causing. MISSENSE ONLY: The p.() variant is a minor/moderate/major change of a very highly conserved amino acid and is not situated within a known functional domain/is situated in the xxxx functional domain. MISSENSE/LOF ONLY: The *GENE* gene is tolerant/intolerant to missense/loss of function variation and/however the specific region of the variant is tolerant/intolerant and low-level benign variation has been observed (gnomAD).  This variant is listed as Pathogenic in ClinVar (215237). It has been previously identified in homozygous or compound heterozygous state in multiple individuals with disease (references). Biochemical testing in cell type showed (reference). Functional studies in a xxxx cell line showed xxxx (reference). This variant has been observed in the gnomAD population database (# heterozygotes, # homozygotes). /// This variant has not been previously identified in other clinical cases. No well-established functional assays are available for assessing the impact of variants in this domain. This variant is rare and has not been observed in the gnomAD population database.  Based on current information this variant has been classified as **PATHOGENIC.** |
|  |  |
|  |  |
|  |  |
| Conclusion: | A likely pathogenic/pathogenic heterozygous variant with high clinical relevance has been identified in *GENE*. Clinical validation of this variant is recommended.  OR  Two heterozygous variants have been identified in the in the *GENE* gene, a pathogenic and a variant of uncertain significance (VUS) with high clinical relevance. Segregation testing is recommended. If the NM_:c. variant in *GENE* is confirmed to be in trans, the classification of this variant will change to likely pathogenic.  OR  A heterozygous variant of uncertain significance (VUS) with high potential clinical relevance has been identified in the *GENE* gene. The *GENE* gene has not been previously reported in connection with a human disease or condition. At this stage, there is insufficient evidence to determine whether it may be contributing to this patient’s condition. Further research is underway to clarify this.  ONLY IF RELEVANT  Heterozygous pathogenic variants in the *GENE* gene was also identified. There is insufficient evidence to determine whether it may be contributing to this patient’s condition or if it represents carrier status. |
|  |  |

| Test Method: | Reanalysis of the existing singleton/trio whole exome sequencing (WES)/genome sequencing (WGS) was performed in a research setting at the Centre for Population Genomics following the DRAGEN GATK best practices pipeline. Reads were aligned to the hg38 reference genome using Dragmap (v1.3.0). Cohort-wide joint calling of single nucleotide variants and small insertion/deletion variants was performed using GATK HaplotypeCaller (v4.1.4.1) with “dragen-mode” enabled. Variants were annotated using VEP v105 and loaded into the web-based variant filtration platform, *seqr* (Pais et al., 2022). Sample sex and relatedness quality checks were performed using Somalier (v0.2.15)(Pedersen et al., 2020). Variants were initially curated utilising the transcript predicted to be the most deleterious to the protein and were reported in accordance with HGVS nomenclature. Where no causative variants were identified within the prioritised gene lists, curation was expanded to “off-Mendeliome” genes covered by the original clinical test. Analysis of Short Tandem Repeats was performed using STRipy v2.2 pipeline (Halman, Dolzhenko & Oshlack, 2022). Structural variant (SV) calling from short-read WGS data was performed using GATK-SV (Collins et al., 2020). The resulting callset was then loaded into CPG instance of *seqr* for analysis. The GATK mitochondrial variant calling pipeline was used to call homoplasmic and heteroplasmic variants in mtDNA from WGS data using mitochondria mode of GATK MuTect2 (Laricchia et al., 2022) and a MitoReport (Bioinfomethods, 2023) was generated for analysis.  Variant(s) have been classified according to the American College of Medical Genetics and Genomics and the Association for Molecular Pathology joint consensus recommendations for the interpretation of sequence variants (Richards et al., 2015) with ClinGen recommendations (ClinGen, n.d.). |
| --- | --- |
|  |  |
|  |  |
| REFERENCES | Collins, R.L., Brand, H., Karczewski, K.J., Zhao, X., Alföldi, J., Francioli, L.C., Khera, A.V., Lowther, C., Gauthier, L.D., Wang, H., Watts, N.A., Solomonson, M., O’Donnell-Luria, A., Baumann, A., Munshi, R., Walker, M., Whelan, C.W., Huang, Y., Brookings, T., Sharpe, T., …Talkowski, M.E. (2020). A structural variation reference for medical and population genetics. *Nature,* *581*, 444–451. https://doi.org/10.1038/s41586-020-2287-8  ClinGen. (n.d.) *SVI General Recommendations for Using ACMG/AMP Criteria*. https://clinicalgenome.org/working-groups/sequence-variant-interpretation/  Halman, A., Dolzhenko, E. & Oshlack, A. (2022). STRipy: a graphical application for enhanced genotyping of pathogenic short tandem repeats in sequencing data. *Human Mutation, 43*(7), 859-868. https://doi.org/10.1002/humu.24382  Laricchia, K.M., Lake, N.J., Watts, N.A., Shand, M., Haessly, A., Gauthier, L., Benjamin, D., Banks, E., Soto, J., Garimella, K., Emery, J., Genome Aggregation Database Consortium, Rehm, H.L., MacArthur, D.G., Tiao, G., Lek, M., Mootha, V.K., Calvo, S.E. (2022). Mitochondrial DNA variation across 56,434 individuals in gnomAD. *Genome Research*, *32*(3), 569-582. https://doi.org/10.1101/gr.276013.121  Pais, L., Snow, H., Weisburd, B., Zhang, S., Baxter, S., DiTroia, S., O’Heir, E., England, E., Chao, K., Lemire, G., Osei-Owusu, I., VanNoy, G., Wilson, M., Nguyen, K., Arachchi, H., Phu, W., Solomson, M., Mano, S., O’Leary, M., … O’Donnell-Luria, A. (2022). *seqr*: a web-based analysis and collaboration tool for rare disease genomics. *Human Mutation.* https://doi.org/10.1002/humu.24366  Pedersen, B.S., Bhetariya, P.J., Brown, J., Kravitz, S.N., Marth, G., Jensen, R.L., Bronner, M.P., Underhill, H.R., & Quinlan, A.R. (2020). Somalier: Rapid relatedness estimation for cancer and germline studies using efficient genome sketches. *Genome Medicine, 12*(1). https://doi.org/10.1186/s13073-020-00761-2  Richards, S., Aziz, N., Bale, S., Bick, D., Das, S., Gastier-Foster, J., Grody, W.W., Hegde, M., Lyon, E., Spector, E., Voelkerding, K., and Rehm, H.L. (2015). Standards and guidelines for the interpretation of sequence variants: a joint consensus recommendation of the American College of Medical Genetics and Genomics and the Association for Molecular Pathology. *Genetics in Medicine, 17*, 405–423. https://doi.org/10.1038/gim.2015.30  Bioinfomethods. (2023). *Mitoreport. GitHub.* https://github.com/bioinfomethods/mitoreport |

|  |  |  |
| --- | --- | --- |
| **Professor John Christodoulou AM**  Lead investigator, UDN-Aus  Director, Genetics Research Theme  Co-leader, Brain & Mitochondrial Research | **Dr xxx**  Clinical Geneticist  Primary variant curator | **Curation support person**  Research officer/Assistant/Fellow  Variant curator/ Supporting variant curator |

END OF RESEARCH REPORT
