# Supplementary material
Source: Research Square preprint supplement (doi:10.21203/rs.3.rs-8091344/v1)
Supplement: Supplementary file 4 [file 57c7cf2aef0b61afb54277ab.docx]

| **Laboratory** | **DTA discussion initiated** | **Date executed** | **Days (total)** | **Weeks (total)** | **Laboratory Specific Parameters** |
| --- | --- | --- | --- | --- | --- |
| Laboratory 1 | 8-Feb-22 | 26-Aug-22 | 143 | 20 | - Data cannot be matched with information on individuals from another source other than datasets specified in the project protocol - Transfer of data to collaborators may only occur if these parties have entered an agreement consistent with the conditions stipulated in the Laboratory 1’s DTA - Must comply with all applicable state laws |
| Laboratory 2 | 21-Apr-22 | 12-Sep-22 | 136 | 19 | - Must comply with all applicable state laws, policies and directives of state government health department - Broad indemnity provided to Laboratory 2 with no indemnity required from MCRI |
| Laboratory 3 | 2-May-22 | 26-Aug-22 | 116 | 17 | - Taken from previously established template agreement with Australian Genomics. In line with UDN-Aus project MIA. |
| Laboratory 4 | 30-Jun-22 | 17-Feb-23 | 232 | 33 | - To allow for transfer requests to be made without needing to email copies of the individual consent forms with each request. - Process for Laboratory 4 representative to audit consent forms within REDCap database was established |
| Laboratory 5 | NA | NA | NA | NA | - $150AUD fee required for each data request to ensure one month timeframe of data release. - Data requested through established commercial request pathway |
