# Supplementary material
Source: Research Square preprint supplement (doi:10.21203/rs.3.rs-8091344/v1)
Supplement: Supplementary file 5 [file 8a047cea3ec6a2386f5afca3.docx]

| **Approving HREC**  The Royal Children’s Hospital HREC, VIC (lead reviewing HREC)  **HREC application cost:** $500  **Number of amendments required:** 11  **Hard copy application required:** N/A  **Time from application to approval:** 7 weeks | | | | | | | | | | |
| --- | --- | --- | --- | --- | --- | --- | --- | --- | --- | --- |
| **Study sites included in HREC approval** | **State/**  **Territory** | **SSA Required** | **Party to MIA** | **Additional Requirements** | **Time for approval (weeks)** | **Amendments required** | **Application cost** | **Study site type** | | |
| **Participant Recruitment/ Sample collection** | **Laboratory testing** | **Research** |
| Hunter Genetics | NSW | ✓ | ✓ | 1,2,3,8,10,11 | 7 | 5 |  | ✓ |  |  |
| King Edward Memorial Hospital: Genetic Services of Western Australia | WA | ✓ | ✓ | 1,2,3,4, 10,11 | 102 | 0 |  | ✓ |  |  |
| Monash Hospital | VIC | ✓ |  | 1,2,3,4,5,10,11 | 3 | 5 | $500 | ✓ |  |  |
| Murdoch Children’s Research Institute | VIC | ✓ | ✓ | 2,5,10 | 7 | 0 |  | ✓ | ✓ |  |
| Royal Brisbane and Women’s Hospital: Genetic Health Queensland | QLD | ✓ | ✓ | 1,2,3,10,11 | 2.5 | 5 |  | ✓ |  |  |
| Royal Children’s Hospital Melbourne | VIC | ✓ | ✓ | 1,2,3,5,10,11 | 7 | 11 |  | ✓ |  |  |
| Royal Darwin Hospital | NT | ✓ | ✓ | 1,3,6,7,8,9,10,11 | 50 | 0 |  | ✓ |  |  |
| Royal Hobart Hospital: Tasmanian Clinical Genetics Service | TAS | ✓ | ✓ | 1,3,4,5,10,11 | 38 | 0 | $3579 | ✓ |  |  |
| Royal Melbourne Hospital | VIC | ✓ |  | 1,2,3,4,5,10,11 | 7 | 1 |  | ✓ |  |  |
| Sydney Children’s Hospital network (Randwick and Westmead) | NSW | ✓ | ✓ | 1,2,3,4,10,11 | 3 | 6 | $150 | ✓ |  |  |
| The Austin Hospital | VIC | ✓ |  | 1,2,3,4,5,10,11 | 12 | 2 | $600 | ✓ |  |  |
| University of Melbourne | VIC | ✓ | ✓ | NA | NA | 0 |  |  |  | ✓ |
| University of Sydney | NSW | ✓ | ✓ | NA | NA | 1 |  |  | ✓ | ✓ |
| Victorian Clinical Genetics Services | VIC | ✓ |  | 2,5,10 | 7 | 0 |  | ✓ |  |  |
| Women's and Children's Hospital: South Australian Clinical Genetics Service | SA | ✓ | ✓ | 1,2,3,10,11,12,13 | 7 | 5 |  | ✓ |  |  |
| **Approving HREC**  University of NSW (expedited via RCH HREC)  **HREC application cost:** $0  **Number of amendments required: 0**  **Hard copy application required:** N/A  **Time from application to approval:** NA | | | | | | | | | | |
| Garvan Institute of Medical Research | NSW | ✓ | ✓ | NA | NA | NA |  |  |  | ✓ |
| **Approving HREC**  University of WA (expedited via RCH HREC)  **HREC application cost:** $0  **Number of amendments required: 0**  **Hard copy application required:** N/A  **Time from application to approval:** NA | | | | | | | | | | |
| Telethon Kid’s Institute | WA | ✓ | ✓ | NA | NA | 0 |  |  |  | ✓ |
|  |  |  |  | **Average** | 20 | **Total** | $5329 |  |  |  |

| 1 | Site Specific PICFs |
| --- | --- |
| 2 | Pathology agreement |
| 3 | Budget form completion and approval |
| 4 | Research Collaboration agreement |
| 5 | Victorian Specific Module |
| 6 | Aboriginal and Torres Strait Islander core values application |
| 7 | Hard copy application |
| 8 | IT security assessment approval |
| 9 | Reciprocal ethics approval letter |
| 10 | Investigator CVs |
| 11 | Associate investigator declaration sign off |
| 12 | Investigator Working with Children Check |
| 13 | Investigator Police Check |

| HREC | Human Research Ethics Committee |
| --- | --- |
| NSW | New South Wales |
| NT | Northern Territory |
| QLD | Queensland |
| SA | South Australia |
| SSA | Site Specific Agreement |
| TAS | Tasmania |
| VIC | Victoria |
| WA | Western Australia |
