# Supplementary material
Source: Research Square preprint supplement (doi:10.21203/rs.3.rs-8091344/v1)
Supplement: Supplementary file 6 [file 9a4869b40038934f04c37470.docx]

| **Participating Institute** | **State/ Territory** | **Multi-Institute Agreement** | | **Research Collaboration Agreement** |
| --- | --- | --- | --- | --- |
| **V1** | **V2** |  |
| **Time for approval (weeks)** | | |
| **Murdoch Children’s Research Institute** | VIC | 21 | 17 | N/A |
| **Metro North Hospital & Health Service** | QLD | 15 | 12 | N/A |
| **North Metropolitan Health Service KEMH** | WA | 14 | 9 | N/A |
| **Women’s and Children’s Health Network** | SA | 13 | 9 | N/A |
| **Tasmanian Health Service** | TAS | 14 | 13 | N/A |
| **University of New South Wales** | NSW | 14 | 9 | N/A |
| **University of Melbourne** | VIC | 13 | 13 | N/A |
| **University of Sydney** | NSW | 20 | 9 | N/A |
| **Sydney Children’s Hospitals Network (Randwick and Westmead)** | NSW | 12 | 9 | N/A |
| **NT Clinical Genetics Service** | NT | N/A | N/A | 35 |
| **Australian National University** | ACT | 12 | 9 | N/A |
| **Hunter New England Local Health District – Hunter** | NSW | 18 | 16 | N/A |
| **Central Adelaide Local Health Network Inc** | SA | 13 | 10 | N/A |
| **Garvan Institute of Medical Research** | NSW | N/A | 11 | N/A |
| **Victorian Clinical Genetics Services** | VIC | N/A | 20 | N/A |
| **Royal Melbourne Hospital** | VIC | N/A | N/A | 48 |
| **Austin Hospital** | VIC | N/A | N/A | 39 |
| **Monash Hospital** | VIC | N/A | N/A | 13 |
