# Supplementary material
Source: Research Square preprint supplement (doi:10.21203/rs.3.rs-8091344/v1)
Supplement: Supplementary file 7 [file a5dbc63141ceca490ed8358a.docx]

| **The Australian Undiagnosed Diseases Network (UDN-Aus): An internationally networked national approach for transforming diagnosis for individuals living with rare diseases (HREC 79712)** | | | |
| --- | --- | --- | --- |
| **PATIENT DETAILS**   | SURNAME: | GIVEN NAME: | | --- | --- | | DOB: | SEX: | | ADDRESS: | POSTCODE: | | TELEPHONE: | | SAMPLE LAB ID: | | | DATE OF COLLECTION: | | | SHIPPING SERVICE: | CONSIGNMENT NUMBER: | | UDN-AUS STUDY ID: | Research Consent Obtained: Y  N | | **SITE:** | | |
| **SITE PRINCIPAL INVESTIGATOR**  Name:  Email: | | **UDN-AUS SAMPLE COORDINATOR**  Tegan Stait  Ph: 03 8341 6287  E: udn.aus-samples@mcri.edu.au  Please notify via above email address if samples are being sent.  **COPY TO:**  Project Coordinator: udn.aus@mcri.edu.au |
| **REQUESTING DOCTOR**  Name:  Signature:  Provider No:  Email: | |
| **PATHOLOGY COLLECTION AND SENDAWAY**  **Please avoid samples arriving at VCGS on FRI/SAT/SUN.**   - Collect samples as requested and perform data entry and process as per SOP. - Do not freeze samples. - Please send blood and tissue samples on OVERNIGHT courier to the below address:   **VCGS Specimen Reception,**  **Royal Children's Hospital,**  **Level 4, East Building, Room EL 4.7.104,**  **50 Flemington Rd, Parkville VIC 3052**  **(03) 8341 6287/6234**  **ATTN: John Christodoulou/Tegan Stait** | **SAMPLE REQUESTED (please tick appropriate box/es)**   |  | DNA retrieval from storage | | --- | --- | | **Blood collection – for VCGS NEST lab** | | |  | 1 x EDTA 2 - 5 ml for DNA | |  | 1 x EDTA 2 - 5 ml for RNA | | **Blood collection – for MCRI Tissue Culture lab** | | |  | 1 x EDTA 5-10 ml* for LYMPHOBLAST CELL LINE | | **Blood collection – for VCGS Mitochondrial lab** | | |  | 1 x EDTA 5-10 ml* for PBMC ISOLATION | | **Skin collection/Fibroblast retrieval – for MCRI Tissue Culture** | | |  | SKIN BIOPSY in Viral Transport Media or Normal Saline | |  | Fibroblast flask completely filled with media for transport and caps sealed with Parafilm | | **Other** | | |  | Specify: |   *A minimum volume of 1ml is acceptable if that is all that can be collected at the time. | | |
| **VCGS SPECIMEN RECEPTION**  **Samples for MCRI Tissue Culture and VCGS Mitochondrial lab**   - Please notify of sample arrival ASAP.   **Samples for VCGS NEST**   - Send to VCGS NEST for research genomic service.   **Note: If insufficient blood collected, and lymphoblast cell line/ PBMC isolation requested, prioritise the blood sample/s for MCRI Tissue Culture.** | **TEST REQUESTED (please tick appropriate box/es)** | | |
| **MCRI TISSUE CULTURE**  Lymphoblast cell line establishment  Skin biopsy storage  Fibroblast culture and storage  **MCRI MITOCHONDRIAL LAB**  PBMC isolation | **VCGS NEST**  DNA extraction and storage  RNA extraction and storage  Research Illumina DNA PCR-free 30x WGS  Research RNA seq  **OTHER**  Specify: | |
| **BILLING INFORMATION** Please email invoices to:  Attn UDN-Aus Project Coordinator  Murdoch Children's Research Institute, The Royal Children's Hospital, 50 Flemington Road, Parkville, Victoria 3052 Australia  Quoting ref ‘MRFF2007567’  E: udn.aus-billing@mcri.edu.au  For **MCRI/VCGS** test billing:  Cost Centre: CM 51547/UDN-Aus | | | |
| I certify that the accompanying specimen was collected from the patient stated above as ascertained by inquiry and/or examination of name band and was labelled immediately following collection.   | SIGNED____________________ | PRINT NAME ___________________ | DATE___/_____/_____ | TIME_____**:**_____ | | --- | --- | --- | --- | | | | |
