# Supplementary material
Source: Research Square preprint supplement (doi:10.21203/rs.3.rs-8091344/v1)
Supplement: Supplementary file 8 [file d096b3f50e2545471295330f.docx]

**STANDARD OPERATING PROCEDURE (SOP): COLLECTION, HANDLING AND SHIPPING BIOLOGICAL SPECIMEN/S**

**The Australian Undiagnosed Diseases Network (UDN-AUS): An internationally networked national approach for transforming diagnosis for individuals living with rare diseases**

| HREC Number: | 79712 |
| --- | --- |
| Document ID | N/A |
| Version No: | 1:0 |
| Date Authorised | 14/10/24 |
| Effective Date | 14/10/24 |
| Review Date: | 14/10/25 |
| Applicable Site/s: | All participating sites |

| Author | Tegan Stait (UDN-Aus Sample Coordinator) |
| --- | --- |
| Approved by | Prof John Christodoulou |
| Signature | 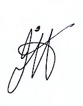 |
| Date | 14th October 2024 |

| Document History | | | |
| --- | --- | --- | --- |
| Version | Summary of Changes | Modified by | Approved by |
| 1.0 | N/A First issue | NA | Prof John Christodoulou |
| 1.1 | Addition of RNA requirements | TS/EM | Prof John Christodoulou |
| Version 1.2 | Updated sample requirements and addition of LRS samples to be sent to the Garvan. | TS | Prof John Christodoulou |

TABLE OF CONTENTS

[**PURPOSE** 2](#_Toc108779251)

[**SCOPE** 2](#_Toc108779252)

[**APPLICABILITY** 2](#_Toc108779253)

[**PROCEDURE** 3](#_Toc108779254)

[*COLLECTION AND HANDLING OF SAMPLES* 3](#_Toc108779255)

[*SHIPPING OF BIOLOGICAL SAMPLES* 4](#_Toc108779256)

[*TRACKING OF SAMPLE MOVEMENT* 5](#_Toc108779257)

[*RECEIVING AND STORING OF SAMPLES* 6](#_Toc108779258)

[*DISPOSAL OF SAMPLES* 6](#_Toc108779259)

[**LABORATORY OPERATING HOURS AND CONTACT INFORMATION** 7](#_Toc108779260)

[**UDN-AUS CONTACTS** 7](#_Toc108779261)

**PURPOSE**

To document the procedures for collection, handling, and shipping of the research biological samples (including but not limited to blood and its components, saliva, urine, tissue biopsies, DNA, RNA, cell culture and cell pellets) in the participating sites of the UDN-AUS project.

Correct collection, handling, and shipping procedures for the project are vital to ensuring the safety of all individuals involved in the sample management and shipping processes. It is also important for ensuring the integrity of the samples collected.

# **SCOPE**

All the participating sites of the project.

# **APPLICABILITY**

This SOP applies to study team members and all relevant external persons involved in the collecting, handling and/or transport of the biological samples obtained from the participating sites for the research project.

# **PROCEDURE**

## *COLLECTION AND HANDLING OF SAMPLES*

Collection of samples should ideally occur early in the week to avoid having samples arrive at VCGS/Garvan Institute on a Friday, Saturday, or Sunday where possible.

Samples must be collected and handled in accordance with the requirements specified below:

| **SAMPLE** | **COLLECTION** | **HANDLING** |
| --- | --- | --- |
| Previously stored DNA | Retrieve sample from storage | Please keep at 4 to 8oC if possible or otherwise room temperature. |
| Blood collection for Lymphoblast cell line# | 1 x EDTA 5-10 ml*  Collect Mon-Wed only |
| Blood collection for PBMC Isolation# | 1 x EDTA 5-10ml*  Collect Mon-Wed only |
| Blood collection for DNA extraction | 1 x EDTA 2-5ml | Do not freeze, samples should be kept at room temperature or 4oC if longer than a few hours. |
| Blood collection for RNA extraction# | 1 x EDTA 2-5ml  Collect Mon-Wed only |
| Blood collection for Long Read Sequencing# | 1 x EDTA (min 2.5ml) | If sample is being sent immediately, keep at room temperature. Otherwise freeze at -80oC immediately after collection, for shipping on dry ice when convenient. |
| Skin Biopsy# | 2-3mm sample of full thickness skin in skin biopsy medium (other suitable media such as viral transport media or normal saline may be used)  Container should be filled completely with fluid to prevent sample from drying out.  Collect Mon-Wed only, if possible. | Please keep at 4 to 8oC if possible or otherwise room temperature.  Ensure not to freeze. |
| Fibroblasts# | 1 or 2 25cm2 flasks of cells (preferably at a low passage number) at about 70 to 80% confluence. | Flasks should be filled with media for transport, caps sealed with parafilm and sent at room temperature. |

# Sample coordinator **must** be notified in advance if these samples are being collected.

* A minimum volume of 1ml is acceptable if that is all that can be collected at the time.

The person handling the sample is required to:

The person handling the sample is required to:

- Perform data entry and collect the sample in the appropriate containers, accurately labelled and immediately handled in accordance with the method and time requirements.

- Document the date and the time of collecting the sample in the request form.
- Proceed to ship the sample from the sites as required, along with associated request form. If the sample is to be stored prior to shipping, ensure sample is stored in accordance with the requirements, taking into consideration storage temperature (ambient temperature, 4°C etc) as outlined above.

## *SHIPPING OF BIOLOGICAL SAMPLES*

The shipping of the biological samples should be processed through the shipping services' staff in the participating sites as outlined below. Where routine shipping is not available, please inform UDN-AUS staff so that a courier service can be arranged.

Below samples are to be shipped to:

VCGS Specimen Reception, Royal Children's Hospital, Level 4, East Building, Room EL 4.7.104, 50 Flemington Rd, Parkville VIC 3052, (03) 8341 6287/6234

ATTN: UDN-AUS Project: John Christodoulou/Tegan Stait

| **SAMPLE** | **SHIPPING** |
| --- | --- |
| DNA | Samples can be sent in batches with routine shipping services. Ship at room temperature or 4oC/ice pack. |
| Blood collection for DNA extraction |
| Blood collection for **Lymphoblast cell line** | Samples **must be shipped urgently** (Monday-Wednesday only) on overnight courier. Ship at room temperature or 4oC/ice pack (if sample container is insulated from ice brick to avoid freezing). Sample coordinator **must** be notified in advance if these samples are being sent. |
| Blood collection for **PBMC Isolation** |
| Blood collection for **RNA extraction** |
| Skin Biopsy | Samples to be sent on overnight courier (Monday-Wednesday only) at room temperature.  Please send as soon as possible after collection, but no later than within 3 days of collection. Sample coordinator **must** be notified in advance if skin biopsy is being sent. |
| Fibroblasts | Samples to be sent on overnight courier (Monday-Wednesday only) at room temperature.  Sample coordinator **must** be notified in advance if fibroblasts are being sent. |

Note: bloods for lymphoblast cell line, PBMC isolation and RNA extraction as well as skin biopsies and fibroblasts should only arrive at VCGS on Monday to Thursday. Please avoid sending these samples on Thursday and don’t send on a Friday.

Below samples are to be shipped to:

Attn: Genomic Technologies Group

Garvan Institute of Medical Research, Precinct Loading Dock

West Street (off Burton Street)

Darlinghurst NSW 2010

Australia

Please **de-identify** all samples being sent to the Genomic Technologies Group.

| **SAMPLE** | **SHIPPING** |
| --- | --- |
| DNA for Long Read Sequencing | Ship at room temperature or 4oC/ice pack. |
| Blood collection for Long Read Sequencing | If sending soon after collection, sample to be shipped at room temperature and must arrive at the Garvan **within 72 hours** of collection. |
| If the above isn’t possible, freeze sample at -80oC ASAP after collection and send to the Garvan on dry ice when convenient. |

Staff members responsible for shipping these samples should have completed the Safe Transport of Infectious Substances by Air (International Air Transport Association; IATA) course, passed and hold a current IATA approved, Civil Aviation Safety Authority (CASA) Certified Dangerous Goods Packing and Shipping certificate. The certified shippers will pack, label, fill out consignment notes and prepare shipper's declarations for the biological samples to be transported.

##

## *TRACKING OF SAMPLE MOVEMENT*

It is essential to mark the movement of the biological samples obtained from the participating sites, starting with the stage of collection, during processing, shipping, distribution, testing, storage, and disposal. Please email [udn.aus-samples@mcri.edu.au](mailto:udn.aus-samples@mcri.edu.au) to notify UDN-AUS staff that a sample has been shipped.

## *RECEIVING AND STORING OF SAMPLES*

The VCGS Specimen Reception staff member receiving the samples should act in accordance with the current specimen reception SOPs and NATA/NPAAC/ISO guidelines.

Storage requirements for samples are listed below:

| **SAMPLE** | **STORAGE REQUIREMENTS** |
| --- | --- |
| DNA | Short term: Room temperature or 4oC  Long term: -30°C |
| Blood collection for Lymphoblast cell line | Room temperature |
| Blood collection for PBMC Isolation | Room temperature |
| Blood collection for DNA/RNA extraction | Room temperature or 4oC if longer than a few hours |
| Skin Biopsy | 4oC |
| Fibroblasts | Room temperature |

## *DISPOSAL OF SAMPLES*

Any unused or waste human specimens from the project stored at MCRI must be disposed of according to the “MCRI Laboratory Waste Disposal Chart”, available on the [MCRI Intranet](https://intranet.mcri.edu.au/rso/environment-health-and-safety/environment-management-and-waste)

Any unused or waste human specimens from the project stored at other laboratory sites must be disposed of according to their corresponding internal waste disposal protocols.

# **LABORATORY OPERATING HOURS AND CONTACT INFORMATION**

MCRI Tissue Culture

*Hours:* 9am to 5pm Monday-Friday

*Phone:* (03) 9936 6746 or (03) 8341 6230

*Email:* [tissueculture@mcri.edu.au](mailto:tissueculture@mcri.edu.au) or [TC@mcri.edu.au](mailto:TC@mcri.edu.au)

VCGS NEST

*Hours:* 8am to 6pm Monday-Friday

*Email:* [genomics@mcri.edu.au](mailto:genomics@mcri.edu.au)

VCGS Specimen Reception

*Hours:* 8am to 6pm Monday-Friday

*Phone:* (03) 9936 6697

*Email:* [specimen.reception@mcri.edu.au](mailto:specimen.reception@mcri.edu.au)

Garvan Institute
Email: [longread@garvan.org.au](mailto:longread@garvan.org.au)

# **UDN-AUS CONTACTS**

For urgent sample enquiries, please contact National Sample Coordinator Tegan Stait or National Project Officers Madeleine Harris and Elle Martin. For all general enquires and to alert the team that samples have been shipped, please email [udn.aus-samples@mcri.edu.au](mailto:udn.aus-samples@mcri.edu.au)

Tegan Stait

UDN-AUS National sample coordinator

Murdoch Children’s Research Institute

E: [tegan.stait@mcri.edu.au](mailto:tegan.stait@mcri.edu.au)

P: 0432441109

Madeleine Harris

UDN-AUS National Project officer

Murdoch Children’s Research Institute

E: [madeleine.harris@mcri.edu.au](mailto:madeleine.harris@mcri.edu.au)

P: 0424221882

Elle Martin

UDN-AUS National Project officer

Murdoch Children’s Research Institute

E: [elle.martin@mcri.edu.au](mailto:elle.martin@mcri.edu.au)

P: 0422079417
