# Supplementary material
Source: Research Square preprint supplement (doi:10.21203/rs.3.rs-8091344/v1)
Supplement: Supplementary file 9 [file e54315193492eb9b8bf8519f.docx]

| Referring Physician: | Dr xxx  xxx Hospital  xxx Street  Suburb  STATE POSTCODE | Patient: | Surname: xxx  First name: xxx  DOB: xxx  Sex: Male/Female  Sample ID: UDN00XX  Date reported: |
| --- | --- | --- | --- |

cc xxxxxxxxx

The Australian Undiagnosed Disease Network (UDN-Aus)

Research Report

| Investigation: | Research reanalysis of the trio/singleton whole genome sequencing/whole exome sequencing data |
| --- | --- |
|  |  |
| Clinical Details: | Patient phenotype. |
|  |  |
| Context: | The previous clinical genetic report 11-01-2019 was non-diagnostic. Re-analysis of the previously generated data was performed in a research setting and new trio whole genome analysis was conducted. |
| Prioritised gene lists: | N/A |
|  |  |
| Research Results: | No clinically relevant variants were identified. Two variants of uncertain significance were identified- etc. |
|  |  |
| Interpretation: | No variants associated with patient name’s phenotype were identified. This result does not preclude the presence of causative genetic variants in this patient. Other targeted investigations, reanalysis of the genomic data, or additional clinical information might aid in the diagnosis of this individual in the future. If these become available via the UDN-Aus project, the team will be in contact with you to discuss these and any relevant results. |

| Test Method: | Reanalysis of the existing singleton/trio whole exome sequencing (WES)/genome sequencing (WGS) was performed in a research setting at the Centre for Population Genomics following the DRAGEN GATK best practices pipeline. Reads were aligned to the hg38 reference genome using Dragmap (v1.3.0). Cohort-wide joint calling of single nucleotide variants and small insertion/deletion variants was performed using GATK HaplotypeCaller (v4.1.4.1) with “dragen-mode” enabled. Variants were annotated using VEP v105 and loaded into the web-based variant filtration platform, *seqr* (Pais et al., 2022). Sample sex and relatedness quality checks were performed using Somalier (v0.2.15)(Pedersen et al., 2020). Variants were initially curated utilising the transcript predicted to be the most deleterious to the protein and were reported in accordance with HGVS nomenclature. Where no causative variants were identified within the prioritised gene lists, curation was expanded to “off-Mendeliome” genes covered by the original clinical test. Analysis of Short Tandem Repeats was performed using STRipy v2.2 pipeline (Halman, Dolzhenko & Oshlack, 2022). Structural variant (SV) calling from short-read WGS data was performed using GATK-SV (Collins et al., 2020). The resulting callset was then loaded into CPG instance of *seqr* for analysis. The GATK mitochondrial variant calling pipeline was used to call homoplasmic and heteroplasmic variants in mtDNA from WGS data using mitochondria mode of GATK MuTect2 (Laricchia et al., 2022) and a MitoReport (Bioinfomethods, 2023) was generated for analysis. |
| --- | --- |
| REFERENCES | | Collins, R.L., Brand, H., Karczewski, K.J., Zhao, X., Alföldi, J., Francioli, L.C., Khera, A.V., Lowther, C., Gauthier, L.D., Wang, H., Watts, N.A., Solomonson, M., O’Donnell-Luria, A., Baumann, A., Munshi, R., Walker, M., Whelan, C.W., Huang, Y., Brookings, T., Sharpe, T., …Talkowski, M.E. (2020). A structural variation reference for medical and population genetics. *Nature,* *581*, 444–451. https://doi.org/10.1038/s41586-020-2287-8  Halman, A., Dolzhenko, E. & Oshlack, A. (2022). STRipy: a graphical application for enhanced genotyping of pathogenic short tandem repeats in sequencing data. *Human Mutation, 43*(7), 859-868. https://doi.org/10.1002/humu.24382  Laricchia, K.M., Lake, N.J., Watts, N.A., Shand, M., Haessly, A., Gauthier, L., Benjamin, D., Banks, E., Soto, J., Garimella, K., Emery, J., Genome Aggregation Database Consortium, Rehm, H.L., MacArthur, D.G., Tiao, G., Lek, M., Mootha, V.K., Calvo, S.E. (2022). Mitochondrial DNA variation across 56,434 individuals in gnomAD. *Genome Research*, *32*(3), 569-582. https://doi.org/10.1101/gr.276013.121  Pais, L., Snow, H., Weisburd, B., Zhang, S., Baxter, S., DiTroia, S., O’Heir, E., England, E., Chao, K., Lemire, G., Osei-Owusu, I., VanNoy, G., Wilson, M., Nguyen, K., Arachchi, H., Phu, W., Solomson, M., Mano, S., O’Leary, M., … O’Donnell-Luria, A. (2022). *seqr*: a web-based analysis and collaboration tool for rare disease genomics. *Human Mutation.* https://doi.org/10.1002/humu.24366  Pedersen, B.S., Bhetariya, P.J., Brown, J., Kravitz, S.N., Marth, G., Jensen, R.L., Bronner, M.P., Underhill, H.R., & Quinlan, A.R. (2020). Somalier: Rapid relatedness estimation for cancer and germline studies using efficient genome sketches. *Genome Medicine, 12*(1). https://doi.org/10.1186/s13073-020-00761-2  Bioinfomethods. (2023). *Mitoreport. GitHub.* https://github.com/bioinfomethods/mitoreport |
|  |  |
|  |  |

|  |  |  |
| --- | --- | --- |
| **Professor John Christodoulou AM**  Lead investigator, UDN-Aus  Director, Genetics Research Theme  Co-leader, Brain & Mitochondrial Research | **Dr xxx**  Clinical Geneticist  Primary variant curator | **Curation support person**  Research officer/Assistant/Fellow  Variant curator/ Supporting variant curator |

END OF RESEARCH REPORT
