# Supplementary material
Source: Research Square preprint supplement (doi:10.21203/rs.3.rs-8091344/v1)
Supplement: Supplementary file 10 [file ffd997caac841ad69ab8a95c.docx]

| **Pathology Site** | **RA discussion initiated** | **Date executed** | **Days (total)** | **Weeks (total)** |
| --- | --- | --- | --- | --- |
| Women’s and Children’s Pathology, Laboratory Services, RCH & RWH | 1-Sep-21 | 23-Sep-21 | 22 | 3 |
| Melbourne Health Pathology | 5-Sep-22 | 30-Mar-23 | 206 | 29 |
| Austin Pathology | 23-Aug-22 | 22-Feb-23 | 183 | 26 |
| Monash Pathology | 15-Aug-22 | 13-Dec-22 | 120 | 17 |
| Pathology Qld | 7-Jan-22 | 8-Jun-22 | 142 | 20 |
| PathWest | 15-Mar-22 | 30-Mar-23 | 380 | 54 |
| SA Pathology | 15-Mar-22 | 24-May-22 | 70 | 10 |
| Royal Hobart Hospital Pathology Services | 23-Mar-22 | 17-Aug-22 | 147 | 21 |
| New South Wales Health Pathology- East | 1-Apr-22 | 1-Dec-22 | 244 | 35 |
| Pathology Services, The Children's Hospital at Westmead | 15-Feb-22 | 29-Mar-22 | 42 | 6 |
| New South Wales Health Pathology- North | 25-Mar-22 | 6-Sep-22 | 165 | 24 |
| Territory Pathology | 18-Jul-22 | 17-May-23 | 303 | 43 |
